# Supplementary material for: An Experimental Comparison of the Impact of ‘Warning’ and ‘Health Star Rating’ FoP Labels on Adolescents’ Choice of Breakfast Cereals in New Zealand
Source: Nutrients. 2020 May 26;12(6):1545. doi: 10.3390/nu12061545 (PMC7352816; doi:10.3390/nu12061545)
Supplement: Supplementary file 1 [file nutrients-12-01545-s001.xlsx]

## Sheet: Sheet1
Case	Group	Date	Source	Pair 1	Pair 2	Pair 3	Age	Gender
191	1	15/10/2018	11Kg Gr1	0	1	0	16	1
192	1	15/10/2018	11Kg Gr1	1	1	0	16	1
193	1	15/10/2018	11Kg Gr1	1	1	0
194	1	15/10/2018	11Kg Gr1	0	1	0	16	0
195	1	15/10/2018	11Kg Gr1	1	0	1	16	0
196	1	15/10/2018	11Kg Gr1	0	0	0	16	0
197	1	15/10/2018	11Kg Gr1	1	1	1	16	0
198	1	15/10/2018	11Kg Gr1	1	0	1	16	0
199	1	15/10/2018	11Kg Gr1	1	0	1	16
200	1	15/10/2018	11Kg Gr1	0	1	1	16	1
201	1	15/10/2018	11Kg Gr1	1	1	1	16	1
202	1	15/10/2018	11Kg Gr1	1	0	1	16	1
203	1	15/10/2018	11Kg Gr1	1	0	1	16	1
204	1	15/10/2018	11Kg Gr1	1	1	0	16	1
205	1	15/10/2018	11Kg Gr1	0	1	0	16	0
206	1	15/10/2018	11Kg Gr1	1	1	1	16	0
207	1	15/10/2018	11Kg Gr1	1	1	0	16	0
208	1	15/10/2018	11Kg Gr1	0	1	0	16	1
209	1	15/10/2018	11Kg Gr1	1	0	0	16	0
210	1	15/10/2018	11Kg Gr1	1	1	1	16	0
211	1	16/10/2018	11Wg GR1	0	1	1
212	1	16/10/2018	11Wg GR1	1	1	0	16	1
213	1	16/10/2018	11Wg GR1	0	0	1	16	0
214	1	16/10/2018	11Wg GR1	0	0	0	16	0
215	1	16/10/2018	11Wg GR1	1	0	0	16	0
216	1	16/10/2018	11Wg GR1	0	0	0
217	1	16/10/2018	11Wg GR1	0	1	0
218	1	16/10/2018	11Wg GR1	0	0	0
219	1	16/10/2018	11Wg GR1	0	0	1	16	0
220	1	16/10/2018	11Wg GR1	0	0	1	16	0
221	1	16/10/2018	11Wg GR1	1	0	1	16	0
222	1	16/10/2018	11Wg GR1	1	0	1	16	0
223	1	16/10/2018	11Wg GR1	0	0	0	16	0
224	1	16/10/2018	11Wg GR1	0	0	0	16	0
225	1	16/10/2018	11Wg GR1	1	0	0	16	0
226	1	16/10/2018	11Wg GR1	0	0	1	16	0
227	1	16/10/2018	11Wg GR1	0	1	0	18	0
228	1	16/10/2018	11Wg GR1	1	0	1	16	1
229	1	16/10/2018	11Wg GR1	0	0	0	16	1
230	1	16/10/2018	11Wg GR1	0	0	0	16	1
231	1	16/10/2018	11Wg GR1	0	0	0	16	0
	Average 1			0.487805	0.414634	0.439024	16.0556	0.342857
150	2	18/10/2018	Cf Gr 2	0	1	0	16	0
151	2	18/10/2018	Cf Gr 2	1	0	0	16	0
152	2	18/10/2018	Cf Gr 2	1	0	1	16	0
153	2	18/10/2018	Cf Gr 2	0	0	0	16	0
154	2	18/10/2018	Cf Gr 2	0	0	0	16	0
155	2	18/10/2018	Cf Gr 2	1	0	1
156	2	18/10/2018	Cf Gr 2	1	0	1
157	2	18/10/2018	Cf Gr 2	1	1	1	16	1
158	2	18/10/2018	Cf Gr 2	1	1	1	16	1
159	2	18/10/2018	Cf Gr 2	1	1	0	16	1
160	2	18/10/2018	Cf Gr 2	1	0	1	15	2
161	2	18/10/2018	Cf Gr 2	1	0	1	16	2
162	2	18/10/2018	Cf Gr 2	1	0	1	16	1
163	2	18/10/2018	Cf Gr 2	1	1	1	16	0
164	2	18/10/2018	Cf Gr 2	0	1	1	16	0
165	2	18/10/2018	Cf Gr 2	1	1	0	16	0
166	2	18/10/2018	Cf Gr 2	1	0	0	16	0
167	2	18/10/2018	Cf Gr 2	1	1	1
168	2	18/10/2018	Cf Gr 2	0	0	1	16	0
169	2	18/10/2018	Cf Gr 2	0	2	2
170	2	17/10/2018	Hl Gr2	0	1	0	16	1
171	2	17/10/2018	Hl Gr2	0	1	0	16	1
172	2	17/10/2018	Hl Gr2	1	1	0	16	1
173	2	17/10/2018	Hl Gr2	1	0	0	15	1
174	2	17/10/2018	Hl Gr2	1	0	0	16	2
175	2	17/10/2018	Hl Gr2	1	0	1
176	2	17/10/2018	Hl Gr2	1	0	1
177	2	17/10/2018	Hl Gr2	1	0	0	16	0
178	2	17/10/2018	Hl Gr2	0	1	0	16	0
179	2	17/10/2018	Hl Gr2	1	0	0	16	0
180	2	17/10/2018	Hl Gr2	0	0	1	16	0
181	2	17/10/2018	Hl Gr2	1	1	0	16	0
182	2	17/10/2018	Hl Gr2	0	1	0	16	0
	Average 2			0.666667	0.484848	0.515152	15.9259	0.518519
99	3	25/10/2018	11Hx Gr3	1	0	1	17	0
100	3	25/10/2018	11Hx Gr3	0	1	0	16	1
101	3	25/10/2018	11Hx Gr3	0	0	0	16	1
102	3	25/10/2018	11Hx Gr3	1	1	0	16	1
103	3	25/10/2018	11Hx Gr3	0	1	1
104	3	25/10/2018	11Hx Gr3	1	0	1	16	1
105	3	25/10/2018	11Hx Gr3	1	0	0	16	0
106	3	25/10/2018	11Hx Gr3	1	0	1	16	0
107	3	25/10/2018	11Hx Gr3	0	0	0	16	2
108	3	25/10/2018	11Hx Gr3	1	0	0	16	0
109	3	25/10/2018	11Hx Gr3	1	0	0	16	0
110	3	25/10/2018	11Hx Gr3	1	0	0	16	1
111	3	25/10/2018	11Hx Gr3	1	0	0	16	0
112	3	25/10/2018	11Hx Gr3	1	0	0	26	1
183	3	19/10/2018	Cn Gr3	0	0	0	17	0
184	3	19/10/2018	Cn Gr3	0	0	0	18	0
185	3	19/10/2018	Cn Gr3	1	1	0	18	1
186	3	19/10/2018	Cn Gr3	0	1	0	18	1
187	3	19/10/2018	Cn Gr3	0	0	1
188	3	19/10/2018	Cn Gr3	1	1	1	18	1
189	3	19/10/2018	Cn Gr3	1	0	0	18	1
190	3	19/10/2018	Cn Gr3	0	0	0	18	0
	Average 3			0.590909	0.272727	0.272727	17.2	0.6
87	4	26/10/2018	Dm Gr4	1	0	1	16	1
88	4	26/10/2018	Dm Gr4	0	0	1	17	0
89	4	26/10/2018	Dm Gr4	1	1	1	16	0
90	4	26/10/2018	Dm Gr4	0	0	0	17	1
91	4	26/10/2018	Dm Gr4	0	0	0	17	0
92	4	26/10/2018	Dm Gr4	0	0	0	17	0
93	4	26/10/2018	Dm Gr4	0	0	1	17	1
94	4	26/10/2018	Dm Gr4	0	0	1	16	0
95	4	26/10/2018	Dm Gr4	1	0	1	17	0
96	4	26/10/2018	Dm Gr4	1	1	1	17	0
97	4	26/10/2018	Dm Gr4	1	0	0	17	0
98	4	26/10/2018	Dm Gr4	1	1	1	17	1
113	4	25/10/2018	Cs Gr4	1	1	1	18	1
114	4	25/10/2018	Cs Gr4	1	1	0	18	1
115	4	25/10/2018	Cs Gr4	1	0	0	18	0
116	4	25/10/2018	Cs Gr4	1	0	0	18	0
117	4	25/10/2018	Cs Gr4	1	1	1	18	1
118	4	25/10/2018	Cs Gr4	1	1	1	17	1
119	4	25/10/2018	Cs Gr4	0	0	0
120	4	25/10/2018	Cs Gr4	0	0	1
121	4	25/10/2018	Cs Gr4	1	0	1
122	4	25/10/2018	Cs Gr4	1	1	1	18	1
	Average 4			0.636364	0.363636	0.636364	17.1579	0.473684
123	5	24/10/2018	H5 Gr5	1	0	11	18	0
124	5	24/10/2018	H5 Gr5	0	0	0	17	0
125	5	24/10/2018	H5 Gr5	1	1	1
126	5	24/10/2018	H5 Gr5	1	1	0	17	1
127	5	24/10/2018	H5 Gr5	1	1	1
128	5	24/10/2018	H5 Gr5	1	0	0	18	1
129	5	24/10/2018	H5 Gr5	0	0	0
130	5	24/10/2018	H5 Gr5	0	0	1	17	0
131	5	24/10/2018	H5 Gr5	0	0	0	17	0
132	5	24/10/2018	H5 Gr5	0	0	0
133	5	24/10/2018	H5 Gr5	0	1	0
134	5	18/10/2018	Fg Gr 5	0	0	1	16	0
135	5	18/10/2018	Fg Gr 5	0	1	0	16	1
136	5	18/10/2018	Fg Gr 5	0	1	0	16	1
137	5	18/10/2018	Fg Gr 5	0	0	0	16	0
138	5	18/10/2018	Fg Gr 5	1	1	0	18	2
139	5	18/10/2018	Fg Gr 5	0	1	0	18	2
140	5	18/10/2018	Fg Gr 5	1	1	0	16	1
141	5	18/10/2018	Fg Gr 5	1	1	0	16	0
142	5	18/10/2018	Fg Gr 5	1	1	0	16	1
143	5	18/10/2018	Fg Gr 5	0	0	0	16	0
144	5	18/10/2018	Fg Gr 5	0	1	1	16	0
145	5	18/10/2018	Fg Gr 5	0	0	1	16	0
146	5	18/10/2018	Fg Gr 5	0	1	0	16	0
147	5	18/10/2018	Fg Gr 5	0	0	0	16	0
148	5	18/10/2018	Fg Gr 5	0	0	1	16	0
149	5	18/10/2018	Fg Gr 5	0	0	0	16	0
	Average 5			0.333333	0.481481	0.666667	16.5455	0.454545
46	6	30/11/2018	Md Gr 6	0	0	0	18	1
47	6	30/11/2018	Md Gr 6	1	0	0	18	1
48	6	30/11/2018	Md Gr 6	1	0	1
49	6	30/11/2018	Md Gr 6	1	0	1
50	6	30/11/2018	Md Gr 6	0	0	0	17	0
51	6	30/11/2018	Md Gr 6	1	0	1	17	1
52	6	30/11/2018	Md Gr 6	1	0	0
53	6	30/11/2018	Md Gr 6	1	0	1	17	0
54	6	25/10/2018	Pd Gr6	1	1	0
55	6	25/10/2018	Pd Gr6	0	0	1	16	0
56	6	25/10/2018	Pd Gr6	1	0	0	17	1
57	6	25/10/2018	Pd Gr6	0	0	1	16	0
58	6	25/10/2018	Pd Gr6	1	1	1	17	1
59	6	25/10/2018	Pd Gr6	1	1	1	16	1
60	6	25/10/2018	Pd Gr6	1	0	1	17	1
61	6	25/10/2018	Pd Gr6	0	1	1	17	1
62	6	25/10/2018	Pd Gr6	0	0	1	16	0
63	6	25/10/2018	Pd Gr6	1	1	1	17	0
64	6	25/10/2018	Pd Gr6	1	1	1	16	1
65	6	25/10/2018	Pd Gr6	0	0	0	17	0
66	6	25/10/2018	Pd Gr6	0	0	0	17	0
67	6	25/10/2018	Pd Gr6	1	1	1	16	0
	average 6			0.636364	0.318182	0.636364	16.7778	0.5
36	7	1/11/2018	11Sr Gr 7	1	1	0	17	1
37	7	1/11/2018	11Sr Gr 7	1	1	0	16	0
38	7	1/11/2018	11Sr Gr 7	0	1	0	17	0
39	7	1/11/2018	11Sr Gr 7	1	0	0	17	0
40	7	1/11/2018	11Sr Gr 7	1	0	1	17	0
41	7	1/11/2018	11Sr Gr 7	1	0	1	17	0
42	7	1/11/2018	11Sr Gr 7	1	0	1	17	0
43	7	1/11/2018	11Sr Gr 7	0	0	0	17	0
44	7	1/11/2018	11Sr Gr 7	1	0	0	17	0
45	7	1/11/2018	11Sr Gr 7	1	1	1	18	0
68	7	30/10/2018	Wl Gr7	1	0	0	16	1
69	7	30/10/2018	Wl Gr7	1	1	0	16	1
70	7	30/10/2018	Wl Gr7	0	0	0	16	0
71	7	30/10/2018	Wl Gr7	1	0	0	16	1
72	7	30/10/2018	Wl Gr7	1	1	0	17	1
73	7	30/10/2018	Wl Gr7	1	1	0	16	0
74	7	30/10/2018	Wl Gr7	1	1	1	17	1
75	7	30/10/2018	Wl Gr7	0	0	1	17	0
76	7	30/10/2018	Wl Gr7	0	1	1	17	0
77	7	30/10/2018	Wl Gr7	0	1	1	16	1
78	7	30/10/2018	Wl Gr7	0	0	0	17	1
79	7	30/10/2018	Wl Gr7	0	1	1	16	1
80	7	30/10/2018	Wl Gr7	0	0	1	17	0
81	7	30/10/2018	Wl Gr7	1	1	1	17	1
82	7	30/10/2018	Wl Gr7	1	0	0	17	0
83	7	30/10/2018	Wl Gr7	0	0	1	16	0
84	7	30/10/2018	Wl Gr7	1	0	1	16	0
85	7	30/10/2018	Wl Gr7	0	0	1	16	0
86	7	30/10/2018	Wl Gr7	0	0	1	17	0
	Average 7			0.586207	0.413793	0.517241	16.6552	0.344828
1	8	2018-02-11	11Jn Gr 8	1	1	0	16	1
2	8	2018-02-11	11Jn Gr 8	1	1	0	16	1
3	8	2018-02-11	11Jn Gr 8	0	0	0	16	0
4	8	2018-02-11	11Jn Gr 8	0	1	0	16	0
5	8	2018-02-11	11Jn Gr 8	1	1	1	16	1
6	8	2018-02-11	11Jn Gr 8	1	1	0	16	1
7	8	2018-02-11	11Jn Gr 8	1	0	1	16	0
8	8	2018-02-11	11Jn Gr 8	1	0	0	16	0
9	8	2018-02-11	11Jn Gr 8	1	0	1	16	0
10	8	2018-02-11	11Jn Gr 8	1	1	1	16	0
11	8	2018-02-11	11Jn Gr 8	0	1	0	16	1
12	8	2018-02-11	11Jn Gr 8	1	1	1	16	1
13	8	2018-02-11	11Jn Gr 8	1	1	1	16	1
14	8	2018-02-11	11Jn Gr 8	1	1	0	16
15	8	2018-02-11	11Jn Gr 8	1	1	1	16	0
16	8	2018-02-11	11Jn Gr 8	1	0	1	16	0
17	8	2018-02-11	11Jn Gr 8	1	0	1	16	0
18	8	2018-02-11	12St Gr 8	0	1	1	16	1
19	8	2018-02-11	12St Gr 8	1			17	1
20	8	2018-02-11	12St Gr 8	1	0	1	17	1
21	8	2018-02-11	12St Gr 8	1	1	0	16	1
22	8	2018-02-11	12St Gr 8	1	0	0	17	1
23	8	2018-02-11	12St Gr 8	0	0	0	17	0
24	8	2018-02-11	12St Gr 8	0	0	0	16	0
25	8	2018-02-11	12St Gr 8	0	1	1	16	0
26	8	2018-02-11	12St Gr 8	0	0	0	16	0
27	8	2018-02-11	12St Gr 8	0	0	0	17	1
28	8	2018-02-11	12St Gr 8	0	0	1	17	0
29	8	2018-02-11	12St Gr 8	1	1	1	16	0
30	8	2018-02-11	12St Gr 8	0	0	1	17	0
31	8	2018-02-11	12St Gr 8	0	1	0	17	2
32	8	2018-02-11	12St Gr 8	0	0	1	16	0
33	8	2018-02-11	12St Gr 8	1	1	0	17	1
34	8	2018-02-11	12St Gr 8	1	0	1	16	0
35	8	2018-02-11	12St Gr 8	0	0	0	17	1
